# Supplementary material
Source: Springer Nature journal article supplement (https://www.springermedizin.de/resource/supplementary/13045_2010_123_MOESM2_ESM.pdf/9660702)

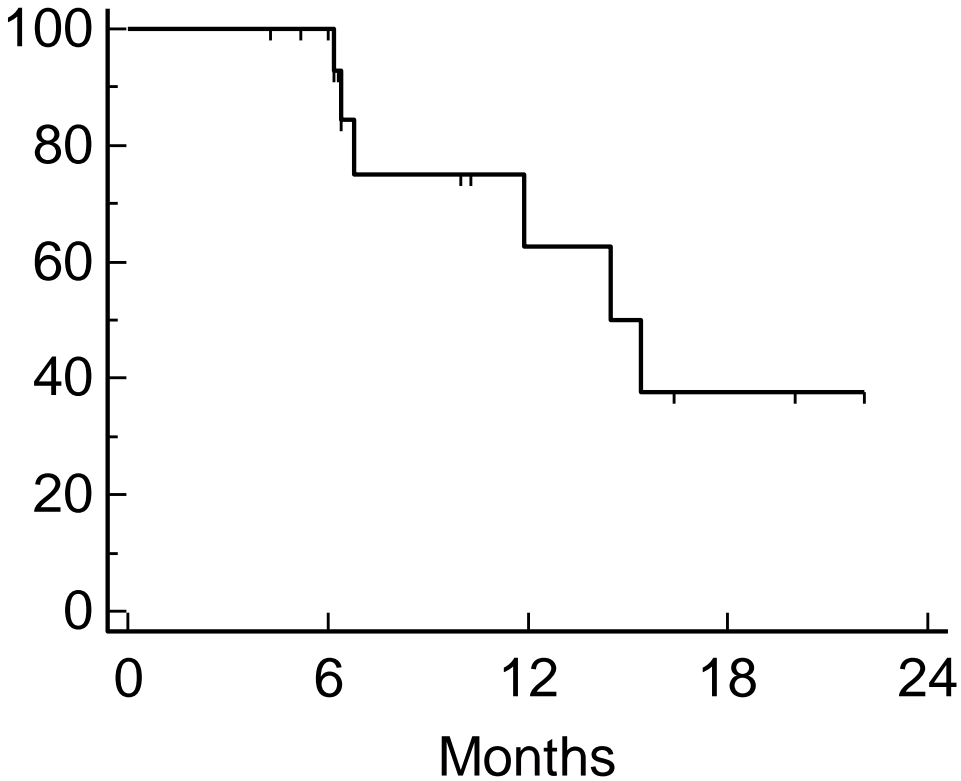

Supplement: MOESM2 [file 9660702]
